# Supplementary material for: The eIF2 kinase PERK and the integrated stress response facilitate activation of ATF6 during endoplasmic reticulum stress
Source: PubMed Central journal article supplement — Mol Biol Cell. 2011 Nov 15;22(22):4390–405. doi: 10.1091/mbc.E11-06-0510 (PMC3216664; doi:10.1091/mbc.e11-06-0510), 2011-11-15
Supplement: supp_E11-06-0510_CombinedSupMats.pdf [file supp_E11-06-0510_CombinedSupMats.pdf]

**The eIF2 kinase PERK and the integrated stress response facilitate activation of ATF6 during endoplasmic reticulum stress.**

Brian F. Teske, Sheree A. Wek, Piyawan Bunpo, Judy K. Cundiff, Jeanette N. McClintick, Tracy G. Anthony, and Ronald C. Wek

**SUPPLEMENTAL TABLES AND FIGURES**

**Supplemental Table 1. Significant changes in gene transcript levels in livers from mice treated with tunicamycin or no ER stress condition.**

|                         |      |      |      |       |       |
|-------------------------|------|------|------|-------|-------|
| <i>p</i> -value (ANOVA) | 0.05 | 0.02 | 0.01 | 0.005 | 0.001 |
| Number of probesets     | 9645 | 7421 | 6201 | 5187  | 3398  |
| FDR (%)                 | 15.0 | 7.0  | 4.2  | 2.5   | 0.8   |

Number of probe sets that changed significantly with respect to tunicamycin treatment.

**Supplemental Table 2. Significant changes in transcript levels in WT and LsPERK-KO livers.**

|                         |      |      |      |       |       |
|-------------------------|------|------|------|-------|-------|
| <i>p</i> -value (ANOVA) | 0.05 | 0.02 | 0.01 | 0.005 | 0.001 |
| Number of probesets     | 4412 | 2738 | 1887 | 1263  | 504   |
| FDR (%)                 | 29.3 | 18.9 | 13.7 | 10.2  | 5.1   |

Number of probe sets that changed significantly with respect to genotype.

**Supplemental Table 3. Interaction Term (condition\*genotype) for microarray analysis.**

|                         |      |      |      |       |       |
|-------------------------|------|------|------|-------|-------|
| <i>p</i> -value (ANOVA) | 0.05 | 0.02 | 0.01 | 0.005 | 0.001 |
| Number of probesets     | 7039 | 4806 | 3610 | 2660  | 1253  |
| FDR (%)                 | 18.4 | 10.8 | 7.2  | 4.9   | 2.1   |

Number of probe sets that changed significantly with respect to condition and genotype.

**Supplemental Figure 1. ATF6 antibody detects endogenous and ATF6 over-expressed in MEF cells.** WT MEF cells were transfected with an HA-tagged ATF6 expression plasmid encoding residues 1-373 (+), or no expression plasmid (-). Cells were then treated (+) for 3 hours with 2  $\mu$ M tunicamycin, or left untreated (-). Cell lysates were prepared and analyzed by immunoblot using antibody that recognizes ATF6, the HA tag, or actin.

**Supplemental Figure 2. PERK facilitates the expression of metabolic genes in response to ER stress.** Graphical representation of the expression of genes involved in metabolism that are significantly reduced ( $p < 0.05$ ) in the LsPERK-KO. The mean fluorescent intensity (MFI) for each transcript is shown as a histogram, along with the S.D

**Supplemental Figure 3. ATF4 induction is required for full activation of ATF6 in response to ER stress in MEF cells.** WT and *ATF4*<sup>-/-</sup> MEF cells derived from an independent knockout (Hettmann *et al.*, 2000) were treated with thapsigargin for up to 6 hours as indicated, and the levels of ATF6, ATF4, and actin were measured by immunoblot analysis.

**Supplemental Figure 4. PERK is required for full induction of XBP1 mRNA in MEF cells treated with tunicamycin.** WT and *PERK*<sup>-/-</sup> MEF cells were treated with 2  $\mu$ M tunicamycin (TUN), as indicated, and mRNA levels for spliced *XBP1*, total *XBP1*, and *ATF4* were measured by qPCR. The “\*” symbol indicates a significant difference ( $p < 0.05$ ) between tunicamycin treated and non-stressed samples, and the “#” symbol represents a significant difference between cell types.

**Supplemental Figure 5. ATF4 is required for full induction of *XBP1* mRNA in response to ER stress.** WT and *ATF4*<sup>-/-</sup> MEF cells were treated with 2 μM tunicamycin (TUN), as indicated. The mRNA levels for spliced *XBP1*, total *XBP1*, and *ATF4* were determined by qPCR. The “\*\*” symbol highlights a significant difference ( $p < 0.05$ ) between tunicamycin treated and non-stressed samples, and the “#” symbol indicates a significant difference between WT and *ATF4*<sup>-/-</sup> cells.

Teske, B.F., et al.

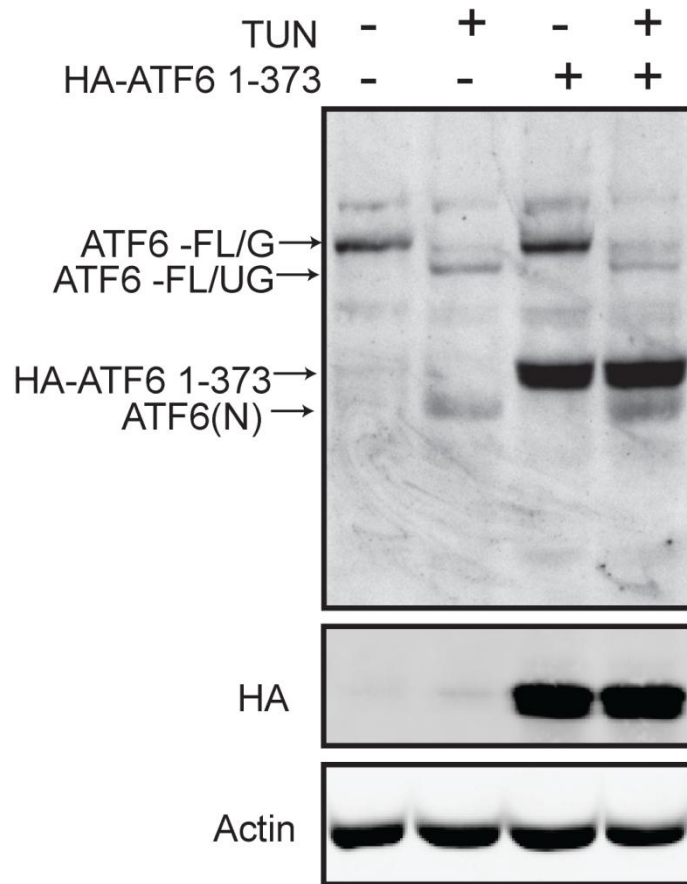

**Supplemental Figure 1. ATF6 antibody detects endogenous and over-expressed ATF6 in MEF cells.**

Teske B.F. et al

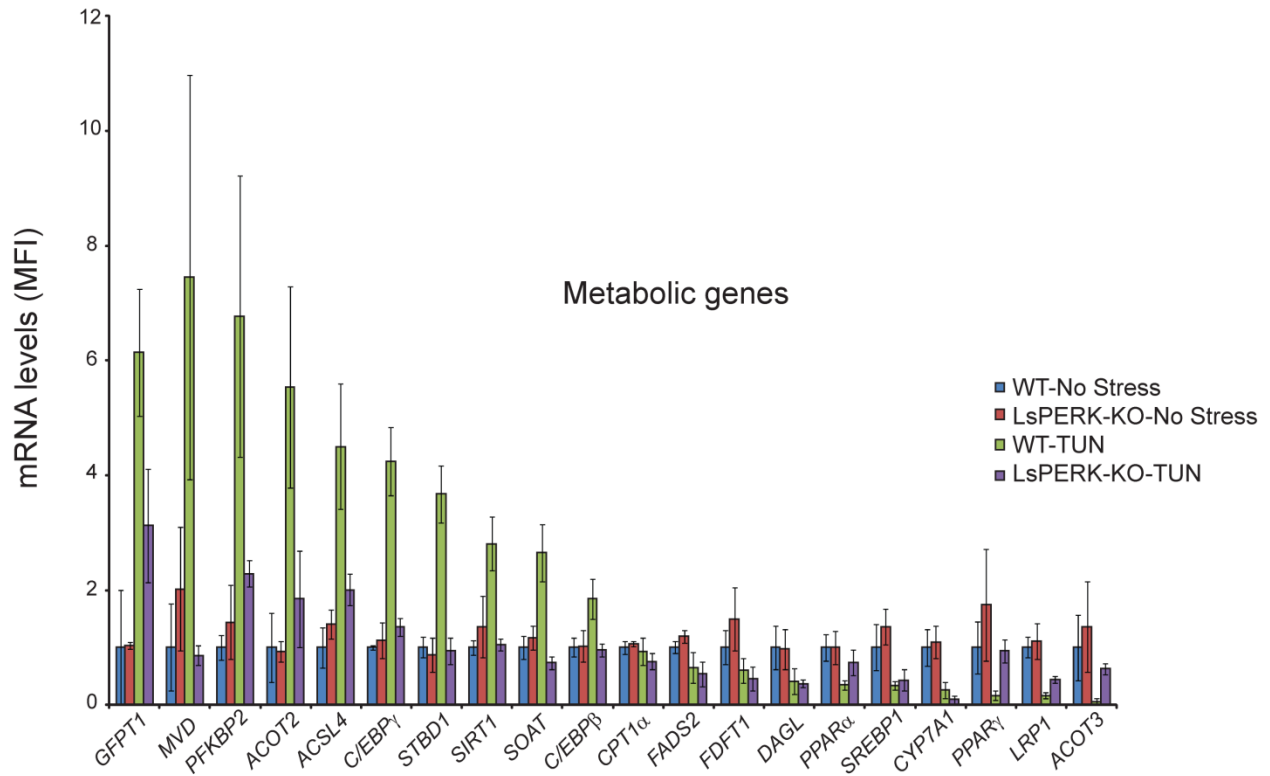

**Supplemental Figure 2. PERK facilitates the expression of metabolic genes in response to ER stress..**

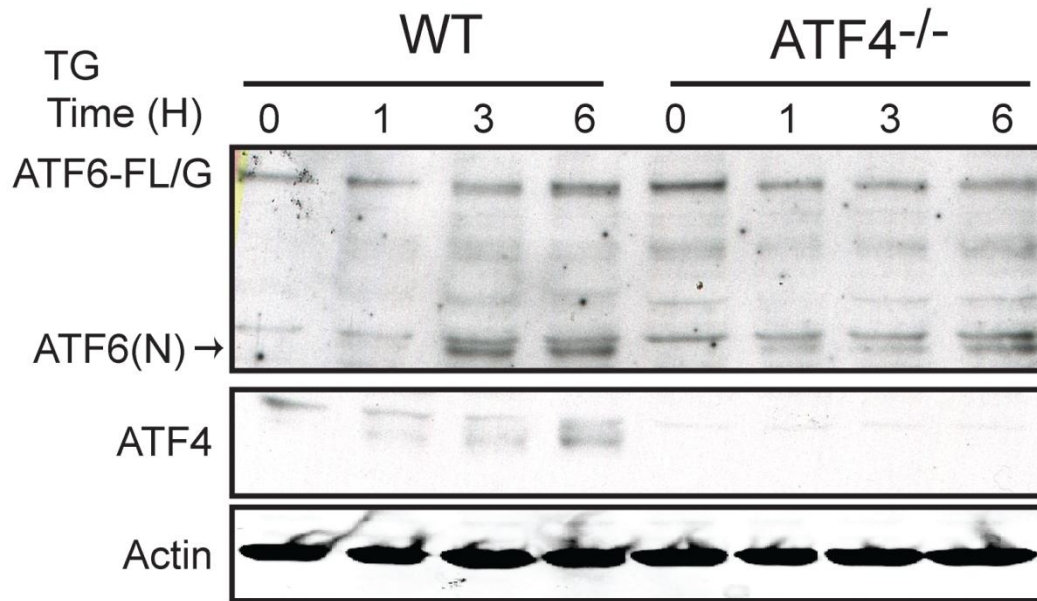

**Supplemental Figure 3. ATF4 induction is required for full activation of ATF6 in response to ER stress in MEF cells.**

Teske, B.F., et al.

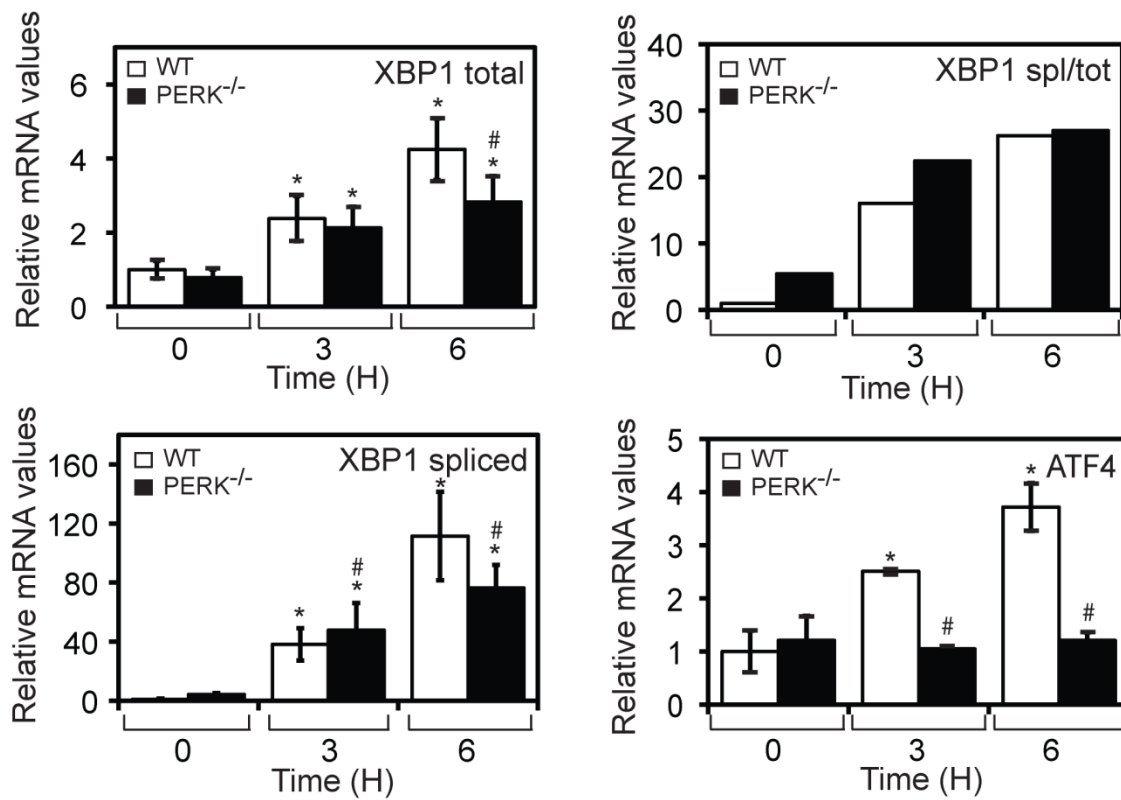

Supplemental Figure 4. PERK is required for full induction of *XBP1* mRNA in MEF cells treated with tunicamycin.

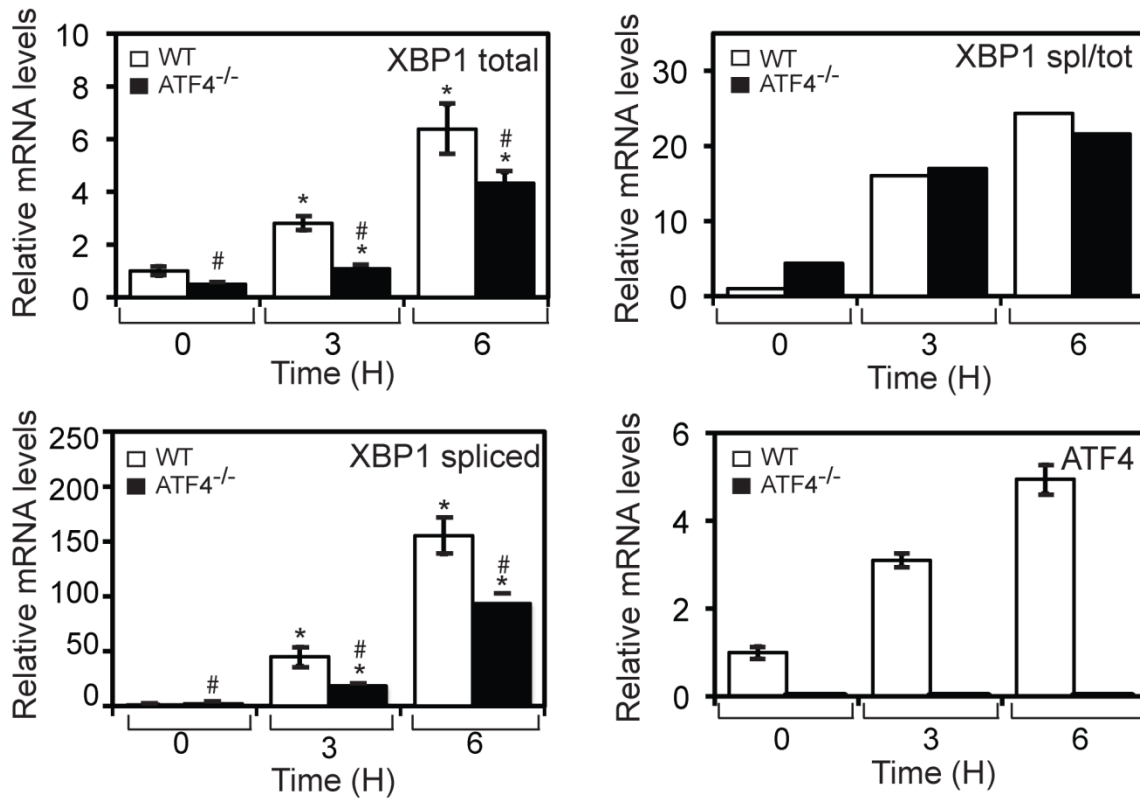

Supplemental Figure 5. ATF4 is required for full induction of *XBP1* mRNA in response to ER stress .
